# Supplementary material for: Metal oxide complexes as precursors of sulfide catalysts for HDS of DBT
Source: Royal Society of Chemistry journal article supplement (doi:10.1039/d4nj03238a), 2024-01-01

## Metal oxide complexes as precursors of sulfide catalysts for HDS of DBT

S. L. Amaya-Bustos<sup>a</sup>, G. Alonso-Núñez<sup>c</sup>, J.N. Díaz De León<sup>c</sup>, S. Fuentes<sup>c</sup>, Adriana Echavarría-Isaza<sup>b</sup>

### Supplementary information

Figure 1S. TGA-DTA decomposition curves.

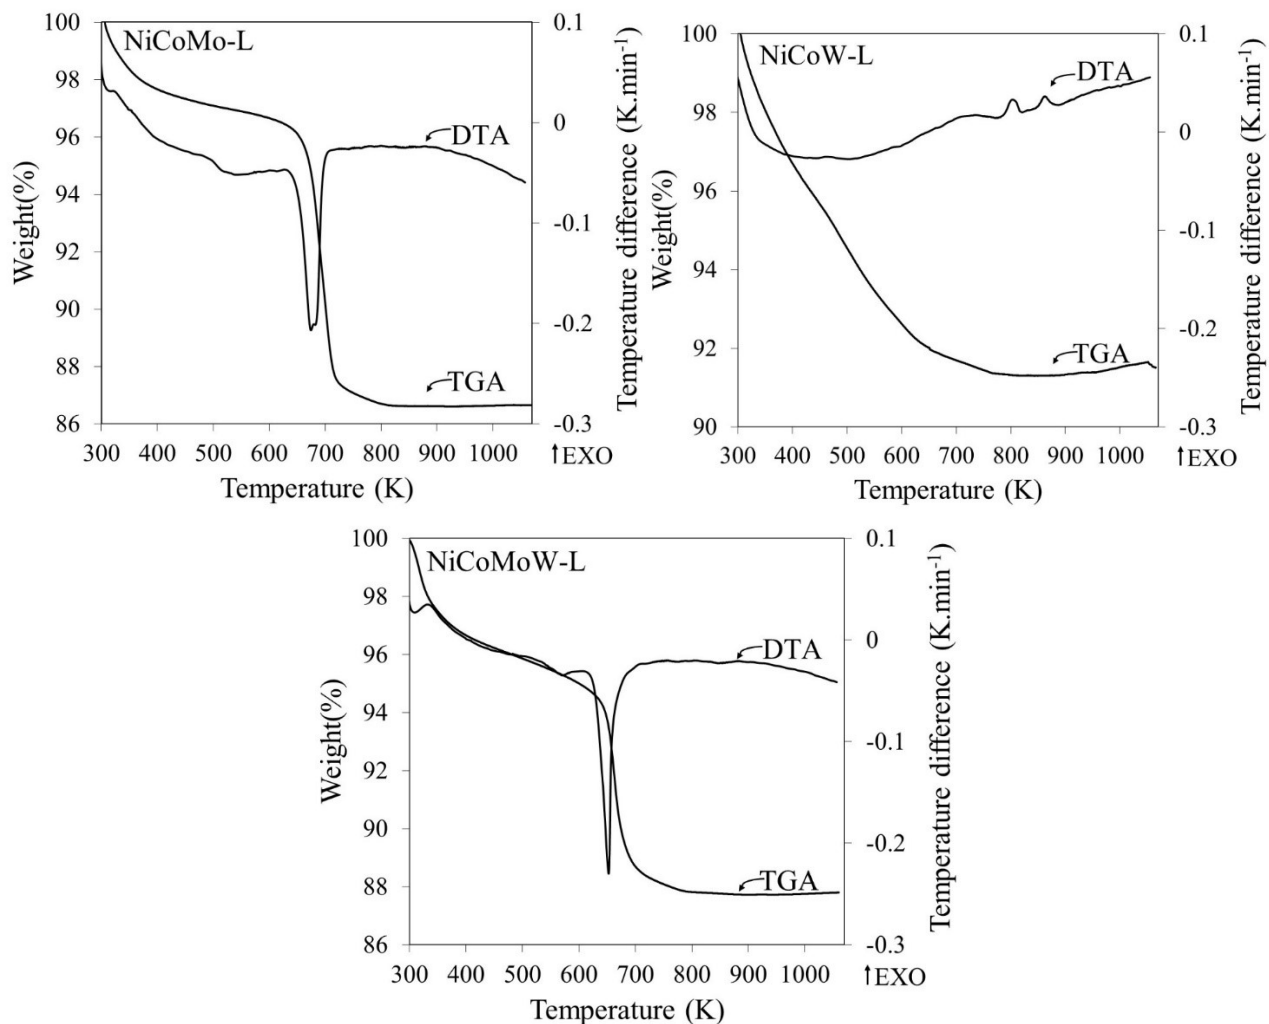

**Figure 2S.** Deconvolution process for the Ni 2p 3/2 emission line region for NiCoMo-O, NiCoW-O and NiCoMoW-O oxide state samples.

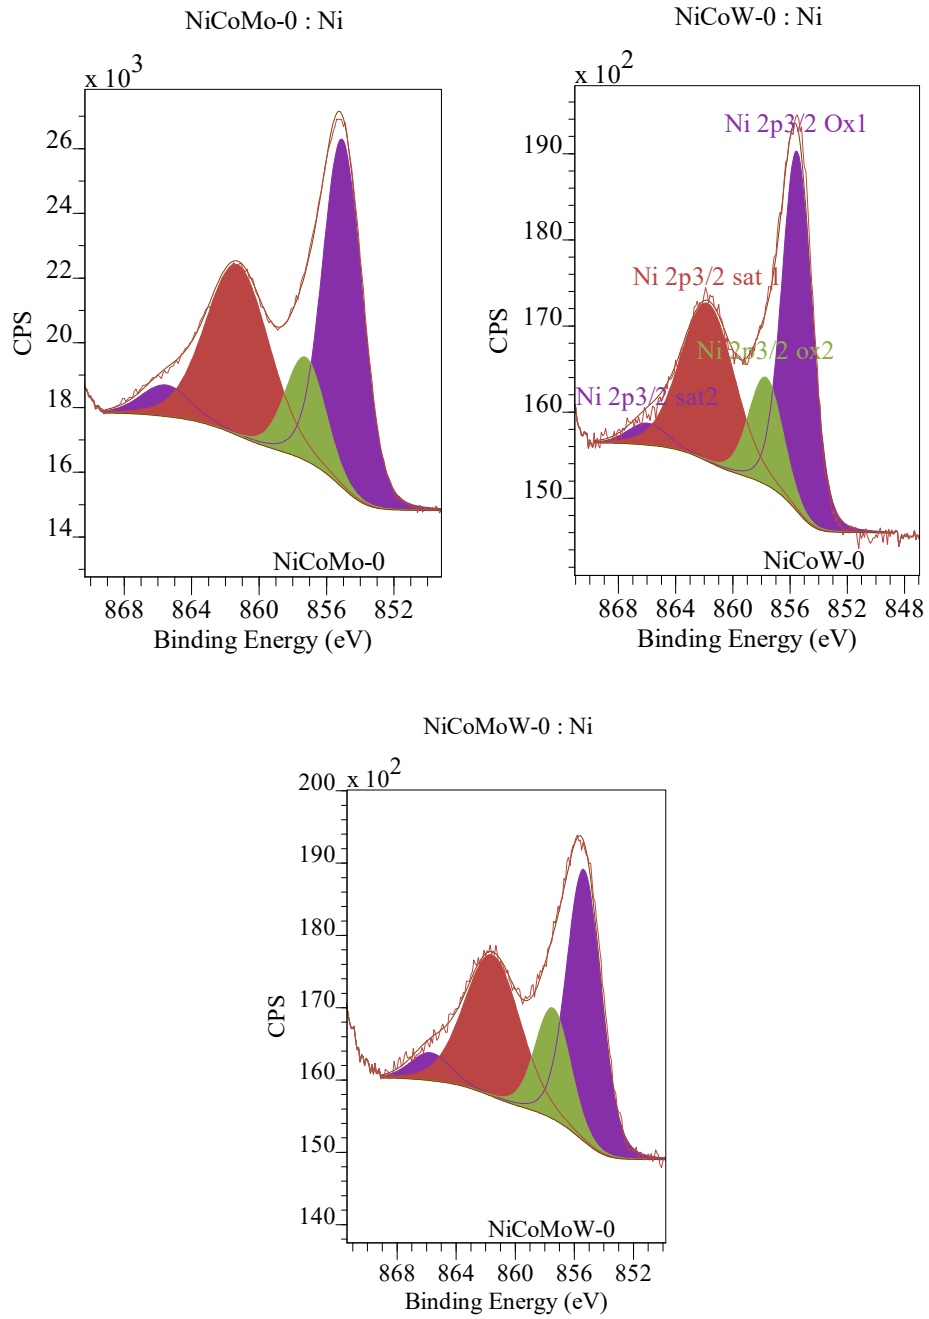

**Figure 3S.** Deconvolution process for the Co 2p 3/2 emission line region for NiCoMo-O, NiCoW-O and NiCoMoW-O oxide state samples.

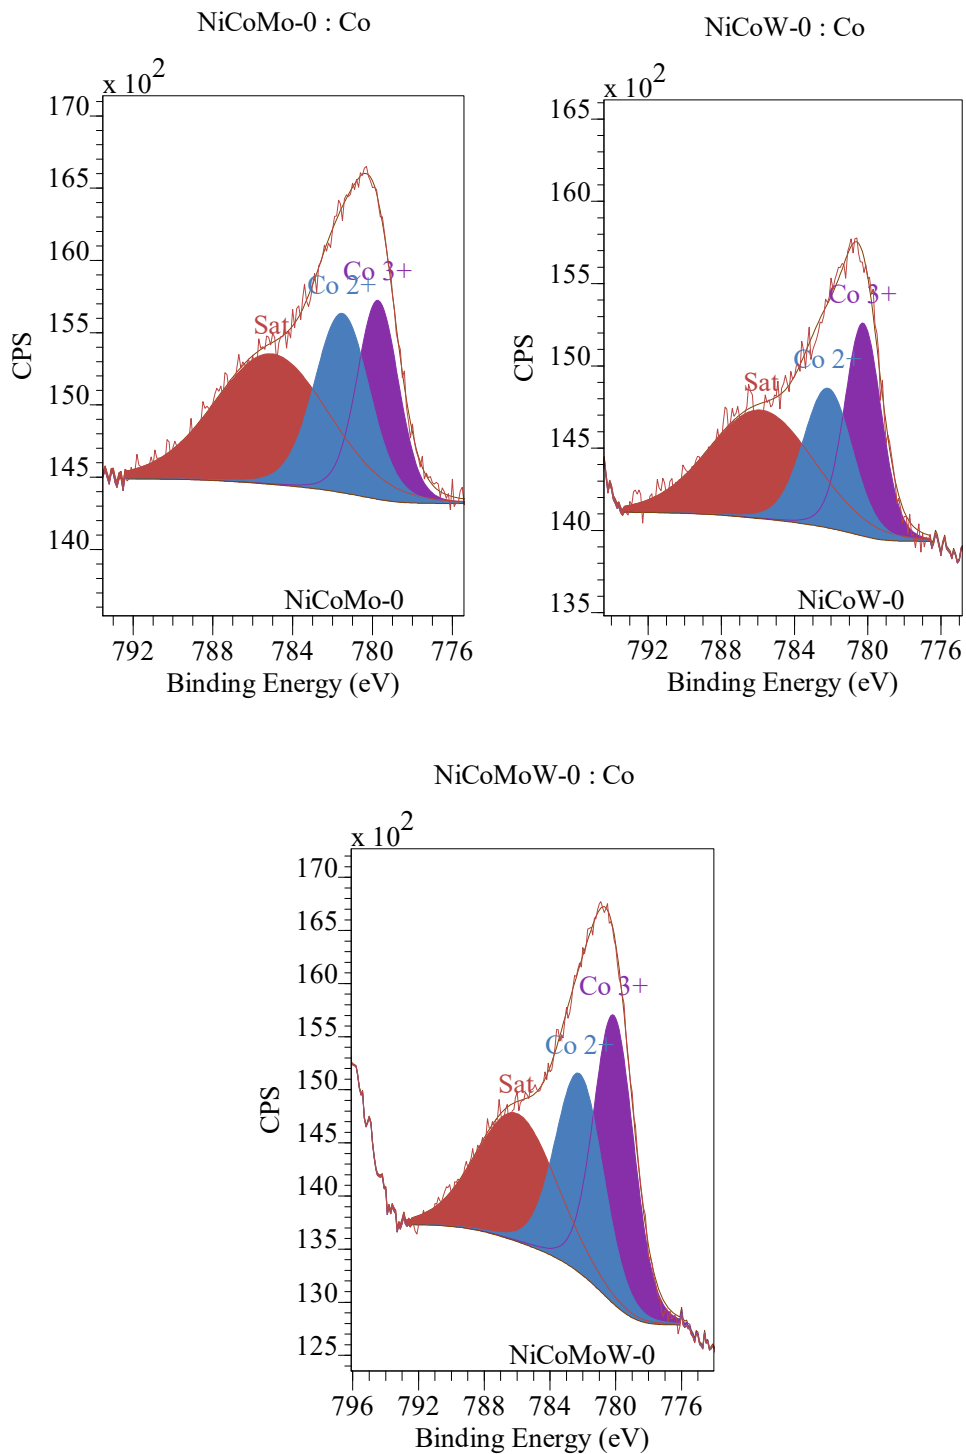

**Figure 4S.** Deconvolution process for the Mo 3d emission line region for NiCoMo-O, and NiCoMoW-O oxide state samples.

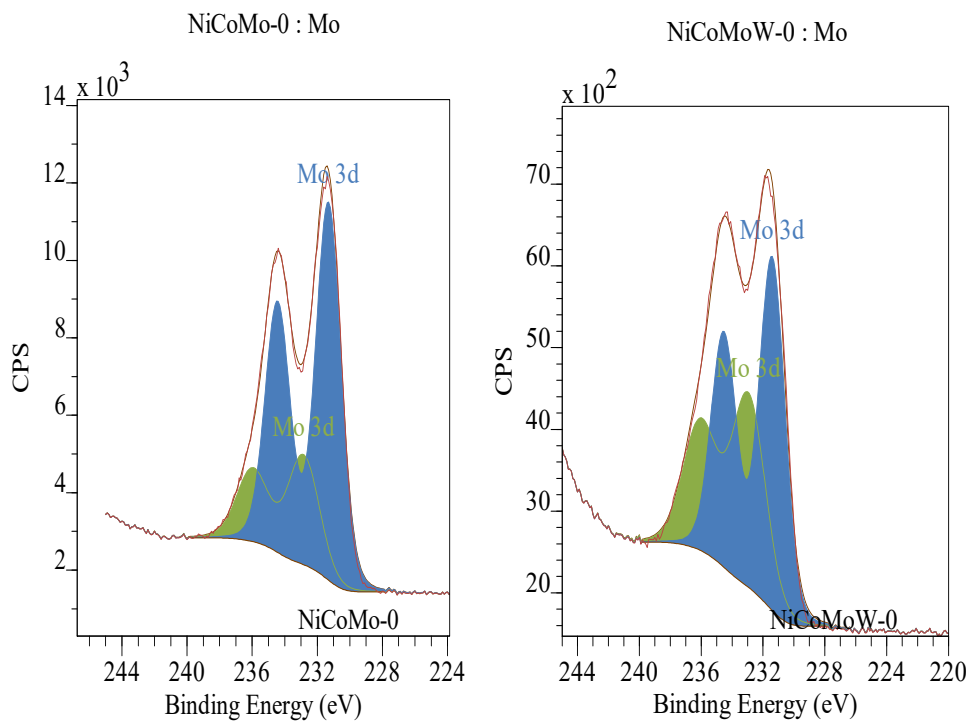

**Figure 5S.** Deconvolution process for the W4f emission line region for NiCoW-O and NiCoMoW-O oxide state samples.

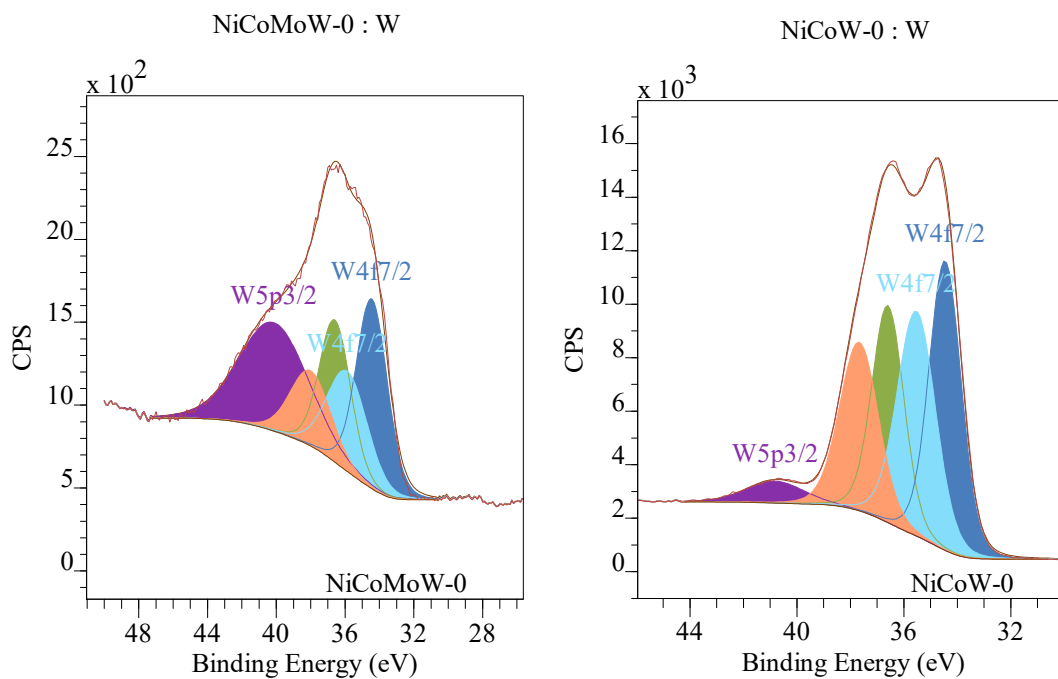

Figure 6S. XRD of TMS catalyst: NiCoMo-S and NiCoMoW-S.

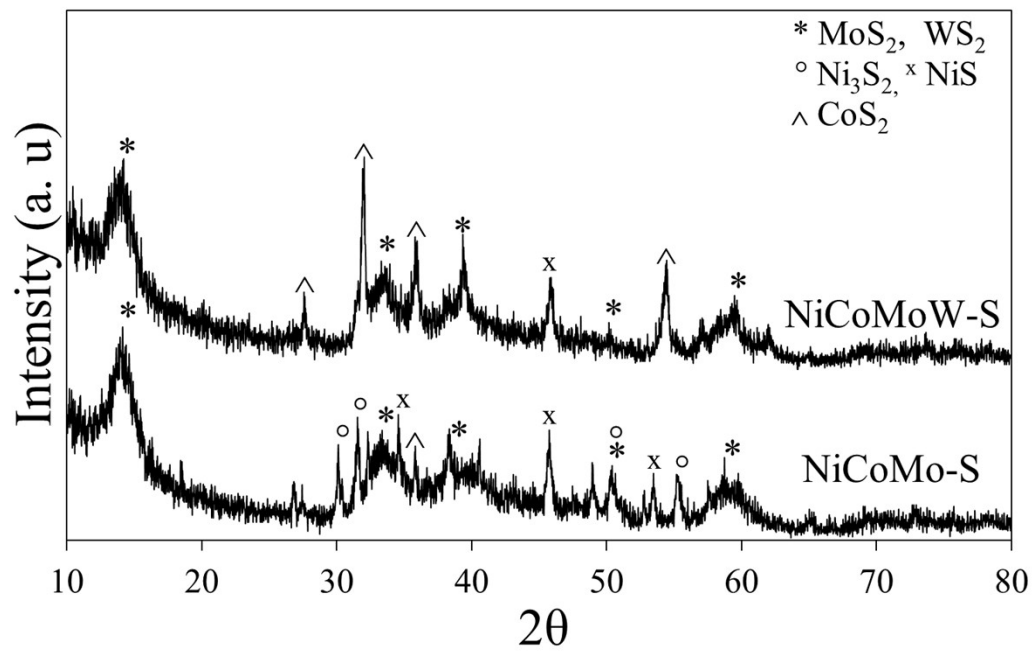

Supplement: d4nj03238a1.pdf [file d4nj03238a1.pdf]
